# Supplementary material for: Cwc21p promotes the second step conformation of the spliceosome and modulates 3′ splice site selection
Source: Oxford University Press journal article supplement (doi:10.1093/nar/gkv159), 2015-03-03
Supplement: gkv159_Supplementary_Data.zip [file gkv159_Supplementary_Data.zip]

## SUPPLEMENTARY INFORMATION

### **Cwc21p promotes the second step conformation of the spliceosome and modulates 3' splice site selection.**

Amit Gautam<sup>1,4,#</sup>, Richard J. Grainger<sup>1,#</sup>, J. Vilardell<sup>2,3</sup>, J. David Barrass<sup>1</sup> and Jean D. Beggs<sup>1,\*</sup>

<sup>1</sup>Wellcome Trust Centre for Cell Biology, University of Edinburgh, King's Buildings, Mayfield Road, Edinburgh, EH9 3BF, UK.

<sup>2</sup>Department of Molecular Genomics, Institute of Molecular Biology of Barcelona (IBMB), Barcelona, Spain.

<sup>3</sup>Institució Catalana de Recerca i Estudis Avançats (ICREA), Spain.

<sup>4</sup>Present address: Department of Medicine, Imperial College London, London W12 0NN, UK.

#equal contribution

\*To whom correspondence should be addressed

Tel: +44-131-650-5351; Fax: +44-131-650-5351; e-mail: jbeggs@ed.ac.uk

## CONTENTS

**SUPPLEMENTARY TABLE S1.** List of yeast strains and plasmids.

**SUPPLEMENTARY FIGURE S1.** Yeast two-hybrid interaction of Snu114p and Cwc21p.

**SUPPLEMENTARY FIGURE S2.** Examples of unusual splicing events in *cwc21Δ*.

## SUPPLEMENTARY REFERENCES

**Supplementary Table S1.** List of yeast strains and plasmids.

| <b>Strain</b>              | <b>Genotype</b>                                                                                                                   | <b>Source/reference</b> |
|----------------------------|-----------------------------------------------------------------------------------------------------------------------------------|-------------------------|
| BY4741 (WT)                | <i>MATa, his3Δ1; leu2Δ0; met15Δ0; ura3Δ0</i>                                                                                      | Euroscarf               |
| Y04316-cwc21Δ              | <i>MATa, his3Δ1 leu2Δ0 lys2Δ0 ura3Δ0, cwc21Δ::KanMX4</i>                                                                          | Euroscarf               |
| L40ΔG                      | <i>MATa his3Δ200 trp1-901 leu2-3,112 ade2 LYS2::(4lexAop-HIS3) URA3::(8lexAop-lacZ) Δgal4::KAN</i>                                | (1)                     |
| yJU75-8+                   | <i>MATa, ade2 cup1Δ::ura3 his3 leu2 lys2 prp8Δ::LYS2 trp1, pMK8-1 (PRP8-wt TRP CEN ARS)</i>                                       | (2)                     |
| yJU75-8-WT-21Δ             | <i>MATa, ade2 cup1Δ::ura3 his3 leu2 lys2 prp8Δ::LYS2 trp1, pMK8-1 (PRP8-wt TRP CEN ARS), cwc21Δ::HPH-NT1</i>                      | This work               |
| U5KO                       | <i>MATa; ura3-52; trp1Δ63; leu2Δ1; his3Δ200; GAL2; snr7Δ::kanMX6; pRS416-U5</i>                                                   | (3)                     |
| U5KO-21Δ                   | <i>MATa; ura3-52; trp1Δ63; leu2Δ1; his3Δ200; GAL2; snr7Δ::kanMX6; pRS416-U5, cwc21Δ::HPH-NT1</i>                                  | This work               |
| PRP16KO                    | <i>Mata, prp16Δ:Hph-NT1, leu2-3,112 trp1-1 can1-100 ura3-1 ade2-1 his3-11,15, pRS416-P<sub>met25</sub>-PRP16,</i>                 | (4)                     |
| PRP16KO -21Δ               | <i>Mata, prp16Δ:Hph-NT1, leu2-3,112 trp1-1 can1-100 ura3-1 ade2-1 his3-11,15, pRS416-P<sub>met25</sub>-PRP16, cwc21Δ::NAT-NT2</i> | This work               |
| yTB23                      | <i>MATa, lys2Δ, his3Δ, leu2Δ, ura3Δ, met15, snu114::KanMX, pTB1</i>                                                               | (5)                     |
| yRG23                      | <i>MATa, lys2Δ, his3Δ, leu2Δ, ura3Δ, met15, snu114::KanMX, pTB1, cwc21::HPH-NT1</i>                                               | This work               |
| <b>Plasmid</b>             | <b>Description</b>                                                                                                                | <b>Source/reference</b> |
| pFA6a-NatNT2               | Nourseothricin knockout vector                                                                                                    | PCR toolbox, Euroscarf  |
| pFA6a-HphNT1               | Hygromycin knockout vector                                                                                                        | PCR toolbox, Euroscarf  |
| pPRP8 series               | pRS314-PRP8-WT, TRP, CEN, ARS                                                                                                     | (2)                     |
|                            | pRS314-prp8-R1753K, TRP, CEN, ARS                                                                                                 | (2)                     |
|                            | pRS314-prp8-162, TRP, CEN, ARS                                                                                                    | (2)                     |
|                            | pRS314-prp8-syf77, TRP, CEN, ARS                                                                                                  | (2)                     |
|                            | pRS314-prp8-161, TRP, CEN, ARS                                                                                                    | (2)                     |
|                            | pRS314-prp8-156, TRP, CEN, ARS                                                                                                    | (2)                     |
| pSNU114 series             | pRS315-SNU114, LEU2, ARS, CEN                                                                                                     | (5)                     |
|                            | pRS315-snu114-40, LEU2, ARS, CEN                                                                                                  | (5)                     |
| pBTM116                    | 2μ, TRP1, lexA(1-202)-BD                                                                                                          | (6)                     |
| pBTM116-Snu114             | 2μ, TRP1, lexA(1-202)-BD-Snu114 (Full length)                                                                                     | This work               |
| pBTM116-Snu114 – IVa+IVb+V | 2μ, TRP1, lexA(1-202)-BD-Snu114 (domains IVa (aa692-aa860) +IVb+V                                                                 | This work               |
| pBTM116-Snu114 – IVa+V     | 2μ, TRP1, lexA(1-202)-BD-Snu114 (domains IVa (aa692-aa860) +V                                                                     | This work               |
| pBTM116-Snu114 – IVb+V     | 2μ, TRP1, lexA(1-202)-BD-Snu114 (domains (IVb+V)                                                                                  | This work               |
| pBTM116-Snu114 –IVa        | 2μ, TRP1, lexA(1-202)-BD-Snu114 domains IVa                                                                                       | This work               |
| pBTM116-Snu114 –IVb        | 2μ, TRP1, lexA(1-202)-BD-Snu114 domains IVb                                                                                       | This work               |
| pBTM116-Snu114 –V          | 2μ, TRP1, lexA(1-202)-BD-Snu114 domains V                                                                                         | This work               |
| pACTII                     | 2μ, LEU2, Gal4-AD                                                                                                                 | (7)                     |
| pACTII-Cwc21               | 2μ, LEU2, Gal4-AD-CWC21 (full length)                                                                                             | (8)                     |
| pU5 snRNA-series           | pRS416-U5-WT, URA3, CEN, ARS                                                                                                      | (3)                     |
|                            | pRS314-U5-1, TRP1, CEN, ARS                                                                                                       | (3)                     |
|                            | pRS314-U5-2, TRP1, CEN, ARS                                                                                                       | (3)                     |
|                            | pRS314-U5-3, TRP1, CEN, ARS                                                                                                       | (3)                     |
|                            | pRS314-U5-Δ94/95, TRP1, CEN, ARS                                                                                                  | (3)                     |
|                            | pRS314-U5-Ins 1U 94/95, TRP1, CEN, ARS                                                                                            | (3)                     |
|                            | pRS314-U5-Δ96/97, TRP1, CEN, ARS                                                                                                  | (3)                     |
|                            | pRS314-U5-ΔG93, TRP1, CEN, ARS                                                                                                    | (3)                     |
|                            | pRS314-U5-Ins 1U 93/94, TRP1, CEN, ARS                                                                                            | (3)                     |
| pPrp16 series              | pRS416-P <sub>met25</sub> -PRP16, URA3, CEN, ARS                                                                                  | (4)                     |
|                            | pRS314-PRP16, TRP1, CEN, ARS                                                                                                      | (4)                     |
|                            | pRS314-prp16-R686I, TRP1, CEN, ARS                                                                                                | (4)                     |

|                  |                                            |           |
|------------------|--------------------------------------------|-----------|
|                  | pRS314- <i>prp16-L335F, TRP1, CEN, ARS</i> | This work |
|                  | pRS314- <i>prp16-K379R, TRP1, CEN, ARS</i> | This work |
|                  | pRS314- <i>prp16-Q685H, TRP1, CEN, ARS</i> | (4)       |
|                  | pRS314- <i>prp16-302, TRP1, CEN, ARS</i>   | (4)       |
|                  | pRS314- <i>prp16-R686Q, TRP1, CEN, ARS</i> | This work |
|                  | pRS314- <i>prp16-Y386D, TRP1, CEN, ARS</i> | This work |
|                  | pRS314- <i>prp16-C862Y, TRP1, CEN, ARS</i> | This work |
|                  | pRS314- <i>prp16-201, TRP1, CEN, ARS</i>   | (4)       |
|                  | pRS314- <i>prp16-202, TRP1, CEN, ARS</i>   | (4)       |
| Copper reporters | pMA-WT                                     | (2)       |
|                  | pMA-A3C                                    | (2)       |
|                  | pMA-BS-G                                   | (2)       |
|                  | pMA-BS-C                                   | (2)       |
|                  | pMM-WT                                     | (2)       |
|                  | pMM-3'UuG                                  | (2)       |

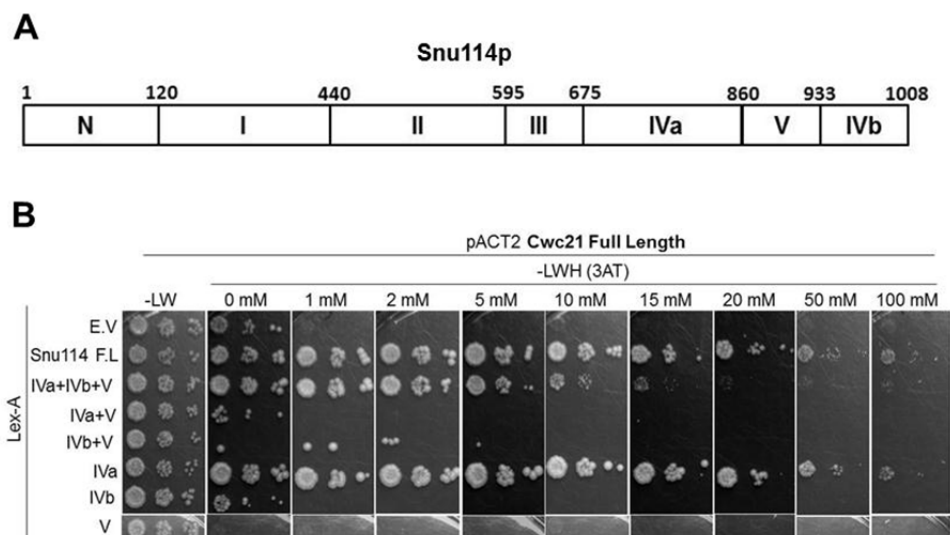

**Supplementary Figure S1.** Yeast two-hybrid interaction of Snu114p and Cwc21p. **(A)** Domain structure of Snu114p. **(B)** Interaction of full-length Cwc21p as a pACT2 fusion (pACT2-Cwc21) with different Snu114p LexA-DNA binding domain constructs on drop-out (lacking leucine (L), tryptophan (W) and/or histidine (H)) plates with different concentrations of 3-aminotriazole (3-AT). The cells were diluted to OD = 0.3 and two tenfold serial dilutions, spotted and grown at 30°C for at least 2 days. F.L is full length; roman numeral indicate the domains of Snu114p present, as in Figure 1A.

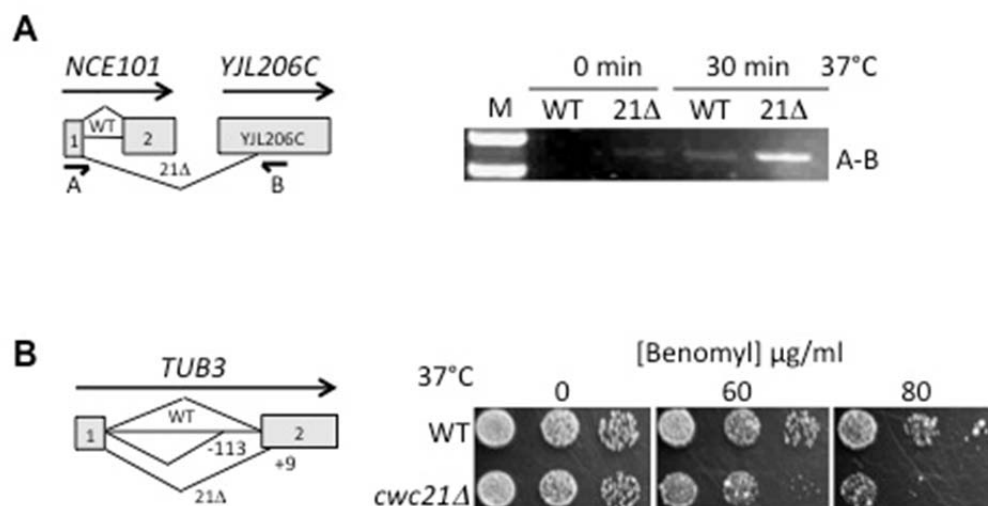

**Supplementary Figure S2.** Examples of unusual splicing events in *cwc21Δ*. **(A)** RT-PCR validation of splicing of *NCE101* exon 1 to a non-canonical 3'SS in *YJL206C*. Left: schematic of the genes as in Fig. 7. Arrows A and B indicate the positions of PCR primers. Right: agarose gel electrophoresis of RT-PCR products from WT and *cwc21Δ* (21Δ) cells grown at 30°C (0 min) or shifted to 37°C for 30 min. **(B)** Left: schematic of *TUB3* alternative splicing, showing the 3'SS detected by microarray analysis (lower; 9 bases downstream of the canonical 3'SS) and an additional 3'SS identified by cDNA sequencing (113 bases upstream of the canonical 3'SS), Right: consistent with a defect in splicing *TUB3* transcripts, sensitivity to the microtubule toxin benomyl is increased in *cwc21Δ* relative to WT at 37°C.

## SUPPLEMENTARY REFERENCES

1. Fromont-Racine,M., Mayes,A.E., Brunet-Simon,A., Rain,J.C., Colley,A., Dix,I., Decourty,L., Joly,N., Ricard,F., Beggs,J.D., *et al.* (2000) Genome-wide protein interaction screens reveal functional networks involving Sm-like proteins. *Yeast Chichester Engl.*, **17**, 95–110.
2. Liu,L., Query,C.C. and Konarska,M.M. (2007) Opposing classes of prp8 alleles modulate the transition between the catalytic steps of pre-mRNA splicing. *Nat. Struct. Mol. Biol.*, **14**, 519–526.
3. Kershaw,C.J., Barrass,J.D., Beggs,J.D. and O’Keefe,R.T. (2009) Mutations in the U5 snRNA result in altered splicing of subsets of pre-mRNAs and reduced stability of Prp8. *RNA*, **15**, 1292–1304.
4. Hahn,D., Kudla,G., Tollervey,D. and Beggs,J.D. (2012) Brr2p-mediated conformational rearrangements in the spliceosome during activation and substrate repositioning. *Genes Dev.*, **26**, 2408–2421.
5. Brenner,T.J. and Guthrie,C. (2005) Genetic analysis reveals a role for the C terminus of the *Saccharomyces cerevisiae* GTPase Snu114 during spliceosome activation. *Genetics*, **170**, 1063–1080.
6. Bartel,P., Chien,C.T., Sternglanz,R. and Fields,S. (1993) Elimination of false positives that arise in using the two-hybrid system. *BioTechniques*, **14**, 920–924.
7. Fromont-Racine,M., Rain,J.C. and Legrain,P. (1997) Toward a functional analysis of the yeast genome through exhaustive two-hybrid screens. *Nat. Genet.*, **16**, 277–282.
8. Grainger,R.J., Barrass,J.D., Jacquier,A., Rain,J.-C. and Beggs,J.D. (2009) Physical and genetic interactions of yeast Cwc21p, an ortholog of human SRm300/SRRM2, suggest a role at the catalytic center of the spliceosome. *RNA*, **15**, 2161–2173.
